# Supplementary material for: Facile fabrication of ultrafine CoNi alloy nanoparticles supported on hexagonal N-doped carbon/Al2O3 nanosheets for efficient protein adsorption and catalysis
Source: Royal Society of Chemistry journal article supplement (doi:10.1039/d2ce00674j), 2022-01-01
Supplement: d2ce00674j1.pdf [file d2ce00674j1.pdf]

## **Facile fabrication of ultrafine CoNi alloy nanoparticles supported on hexagonal N-doped carbon/Al<sub>2</sub>O<sub>3</sub> nanosheets for efficient protein adsorption and catalysis**

Xiaoying He<sup>a</sup>, Suping Han<sup>b\*</sup>, Jing Zheng<sup>a</sup>, Jingli Xu<sup>a</sup>, Xuebo Yin<sup>a</sup>, Min Zhang<sup>a\*</sup>.

<sup>a</sup> *College of Chemistry and Chemical Engineering, Shanghai University of Engineering Science, Shanghai 201620, PR China. E-mail: zhangmin@sues.edu.cn*

<sup>b</sup> *Department of Pharmacy, Shandong Medical College, No.5460 Erhuannanlu Road, Jinan 250002, China. supinghan@163.com.*

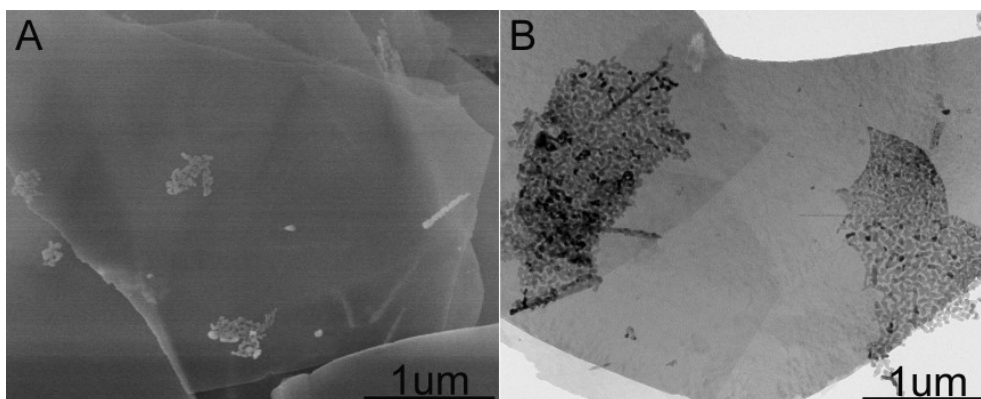

Figure S1. SEM and TEM images of Co/Al<sub>2</sub>O<sub>3</sub> (A, B).

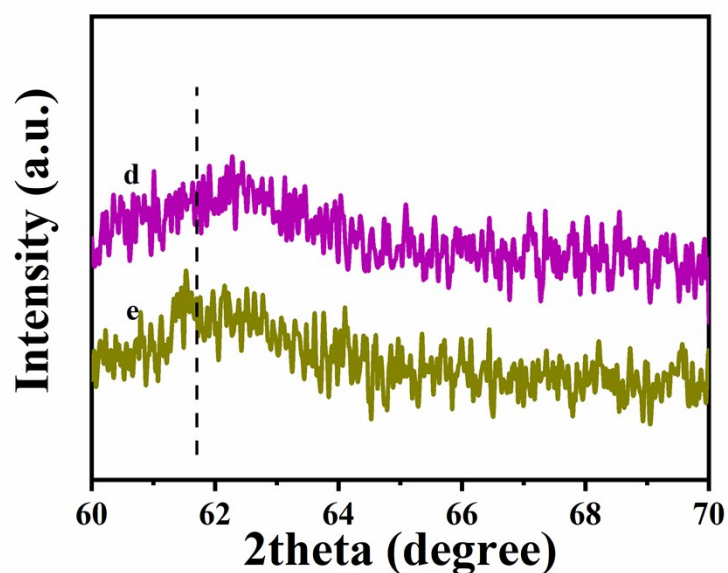

Figure S2. XRD images of C-CoNi/Al<sub>2</sub>O<sub>3</sub> (d) C-Co/Al<sub>2</sub>O<sub>3</sub>(e).

**Table S1.** N<sub>2</sub> adsorption–desorption isotherms corresponding pore size distributions of the synthesized C-CoNi/Al<sub>2</sub>O<sub>3</sub>, C-Co/Al<sub>2</sub>O<sub>3</sub>, Co/Al<sub>2</sub>O<sub>3</sub>.

| Samples                               | BET Surface Area (m <sup>2</sup> g <sup>-1</sup> ) | Pore Volume ( cm <sup>3</sup> g <sup>-1</sup> ) | Pore Size (nm) |
|---------------------------------------|----------------------------------------------------|-------------------------------------------------|----------------|
| Co/Al <sub>2</sub> O <sub>3</sub>     | 8.7                                                | 0.0227                                          | 10.5           |
| C-Co/Al <sub>2</sub> O <sub>3</sub>   | 25.4                                               | 0.0298                                          | 4.7            |
| C-CoNi/Al <sub>2</sub> O <sub>3</sub> | 33.9                                               | 0.0285                                          | 3.4            |

**Table S2.** The ICP data of C-CoNi/Al<sub>2</sub>O<sub>3</sub> with different calcination temperature before and after catalytic reaction.

| Catalysts                             | Co ( $\mu\text{g}.\text{mg}^{-1}$ ) | Ni ( $\mu\text{g}.\text{mg}^{-1}$ ) |
|---------------------------------------|-------------------------------------|-------------------------------------|
| C-CoNi/Al <sub>2</sub> O <sub>3</sub> | 298.29                              | 197.63                              |
| C-Co/Al <sub>2</sub> O <sub>3</sub>   | 410.86                              | /                                   |
| Co/Al <sub>2</sub> O <sub>3</sub>     | 266.33                              | /                                   |

**Table S3.** A full comparison of C-CoNi/Al<sub>2</sub>O<sub>3</sub> nanosheets catalysis activity and test condition with other nickel and noble metal catalysts.

| Catalyst                              | Type          | K( $\times 10^{-3}\text{s}^{-1}$ ) | $\kappa(\text{g}^{-1}\text{s}^{-1})$ | Reference |
|---------------------------------------|---------------|------------------------------------|--------------------------------------|-----------|
| C-CoNi/Al <sub>2</sub> O <sub>3</sub> | nanosheets    | 3.86                               | 210.58                               | This work |
| C-Co/Al <sub>2</sub> O <sub>3</sub>   | nanosheets    | 2.02                               | 4.92                                 | This work |
| Co/Al <sub>2</sub> O <sub>3</sub>     | nanosheets    | 1.21                               | 4.54                                 | This work |
| Ni/p (AMPS)                           | Hydrogel      | 0.9                                | 0.15                                 | 1         |
| Ni/MC-550                             | Nanotube      | 1.51                               | 338                                  | 2         |
| Ni/SiO <sub>2</sub>                   | Core-shell    | 2.8                                | 0.94                                 | 3         |
| RGO-Ni                                | Nanosheets    | 0.25                               | 0.04                                 | 4         |
| C-Ni/400                              | Core-shell    | 5.9                                | 142                                  | 5         |
| Ni/SNTs                               | Nanotube      | 9.9                                | 31                                   | 6         |
| Ni (modified)                         | Nanoparticles | 2.4                                | 0.80                                 | 7         |

**Table S4.** Isotherm parameters for the adsorption of BHB protein on the C-CoNi/Al<sub>2</sub>O<sub>3</sub>.

| T(°C)                                 | Langmuir model         |                       |                | Freundlich model      |      |                |
|---------------------------------------|------------------------|-----------------------|----------------|-----------------------|------|----------------|
|                                       | K <sub>d</sub> (mg/mL) | Q <sub>m</sub> (mg/g) | R <sup>2</sup> | K <sub>F</sub> (mg/g) | n    | R <sup>2</sup> |
| C-CoNi/Al <sub>2</sub> O <sub>3</sub> | 0.10                   | 1164.4                | 0.9980         | 585.9                 | 1.72 | 0.9314         |
| C-Co/Al <sub>2</sub> O <sub>3</sub>   | 0.38                   |                       | 0.9997         |                       |      |                |
| Co/Al <sub>2</sub> O <sub>3</sub>     | 0.26                   |                       | 0.9984         |                       |      |                |

**Table S5.** Properties of different adsorbents for BHB capture

| Adsorbent                             | Capacity (mg g <sup>-1</sup> ) | Reference |
|---------------------------------------|--------------------------------|-----------|
| C-CoNi/Al <sub>2</sub> O <sub>3</sub> | 1164.4                         | This work |

|                                                      |        |    |
|------------------------------------------------------|--------|----|
| Fe <sub>3</sub> O <sub>4</sub> @SiO <sub>2</sub> @IL | 2150   | 8  |
| CNTs/Fe <sub>3</sub> O <sub>4</sub> @CuSilicate      | 302.3  | 9  |
| Cu-IDA-silica-coated Fe <sub>3</sub> O <sub>4</sub>  | 418.6  | 10 |
| Magnetic HCNTs                                       | 2200   | 11 |
| Ni-MNPs                                              | 1054.3 | 12 |

## Reference

- Sahiner, N.; Ozay, H.; Ozay, O.; Aktas, N., New catalytic route: Hydrogels as templates and reactors for in situ Ni nanoparticle synthesis and usage in the reduction of 2- and 4-nitrophenols. *Applied Catalysis A General* **2010**, *385* (1–2), 201-207.
- Yang, Y.; Ren, Y.; Sun, C.; Hao, S., Facile route fabrication of nickel based mesoporous carbons with high catalytic performance towards 4-nitrophenol reduction. *Green Chemistry* **2014**, *16* (4), 2273-2280.
- Jiang, Z.; Xie, J.; Jiang, D.; Jing, J.; Qin, H., Facile route fabrication of nano-Ni core mesoporous-silica shell particles with high catalytic activity towards 4-nitrophenol reduction. *Life Sciences* **2012**, *14* (14), 4601-4611.
- Ji, Z.; Shen, X.; Zhu, G.; Zhou, H.; Yuan, A., Reduced graphene oxide/nickel nanocomposites: facile synthesis, magnetic and catalytic properties. *Journal of Materials Chemistry* **2012**, *22* (8), 3471-3477.
- Ding, L.; Zhang, M.; Zhang, Y.; Yang, J.; Zheng, J.; Hayat, T.; Alharbi, N. S.; Xu, J., Tailoring the nickel nanoparticles anchored on the surface of Fe<sub>3</sub>O<sub>4</sub>@SiO<sub>2</sub> spheres for nanocatalysis. *Nanotechnology* **2017**, *28* (34), 345601.
- Zhang, S.; Gai, S.; He, F.; Ding, S.; Li, L.; Yang, P., In situ assembly of well-dispersed Ni nanoparticles on silica nanotubes and excellent catalytic activity in 4-nitrophenol reduction. *Nanoscale* **2014**, *6* (19), 11181-8.
- Jiang, Z.; Xie, J.; Jiang, D.; Wei, X.; Chen, M., Modifiers-assisted formation of nickel nanoparticles and their catalytic application to p-nitrophenol reduction. *Crystengcomm* **2012**, *15* (3), 560-569.
- Wei, Y.; Li, Y.; Tian, A.; Fan, Y.; Wang, X., Ionic liquid modified magnetic microspheres for isolation of heme protein with high binding capacity. *Journal of Materials Chemistry B* **2013**, *1* (15), 2066-2071.
- Zhang, M.; Wang, Y.; Zhang, Y.; Ding, L.; Zheng, J.; Xu, J., Preparation of magnetic carbon nanotubes with hierarchical copper silicate nanostructure for efficient adsorption and removal of hemoglobin. *Applied Surface Science* **2016**, *375*, 154-161.
- Zhang, M.; Cheng, D.; Prof, X. H.; Chen, L.; Prof, Y. Z., Magnetic Silica-Coated Sub-Microspheres with Immobilized Metal Ions for the Selective Removal of Bovine Hemoglobin from Bovine Blood. *Chemistry – An Asian Journal* **2010**, *5* (6), 1332-1340.
- Zhang, M.; Wang, B.; Zhang, Y.; Li, W.; Gan, W.; Xu, J., Facile synthesis of magnetic hierarchical copper silicate hollow nanotubes for efficient adsorption and removal of hemoglobin. *Dalton Transactions* **2016**, *45* (3), 922.
- Wang, Y.; Zhang, M.; Wang, L.; Li, W.; Zheng, J.; Xu, J., Synthesis of hierarchical nickel anchored on Fe<sub>3</sub>O<sub>4</sub>@SiO<sub>2</sub> and its successful utilization to remove the abundant proteins (BHb) in bovine blood.
